# Supplementary material for: Signaling by the integrated stress response kinase PKR is fine-tuned by dynamic clustering
Source: PubMed Central journal article supplement (PMC9086502; doi:10.1083/jcb.202111100), 2022-05-06

p-eIF2 $\alpha$

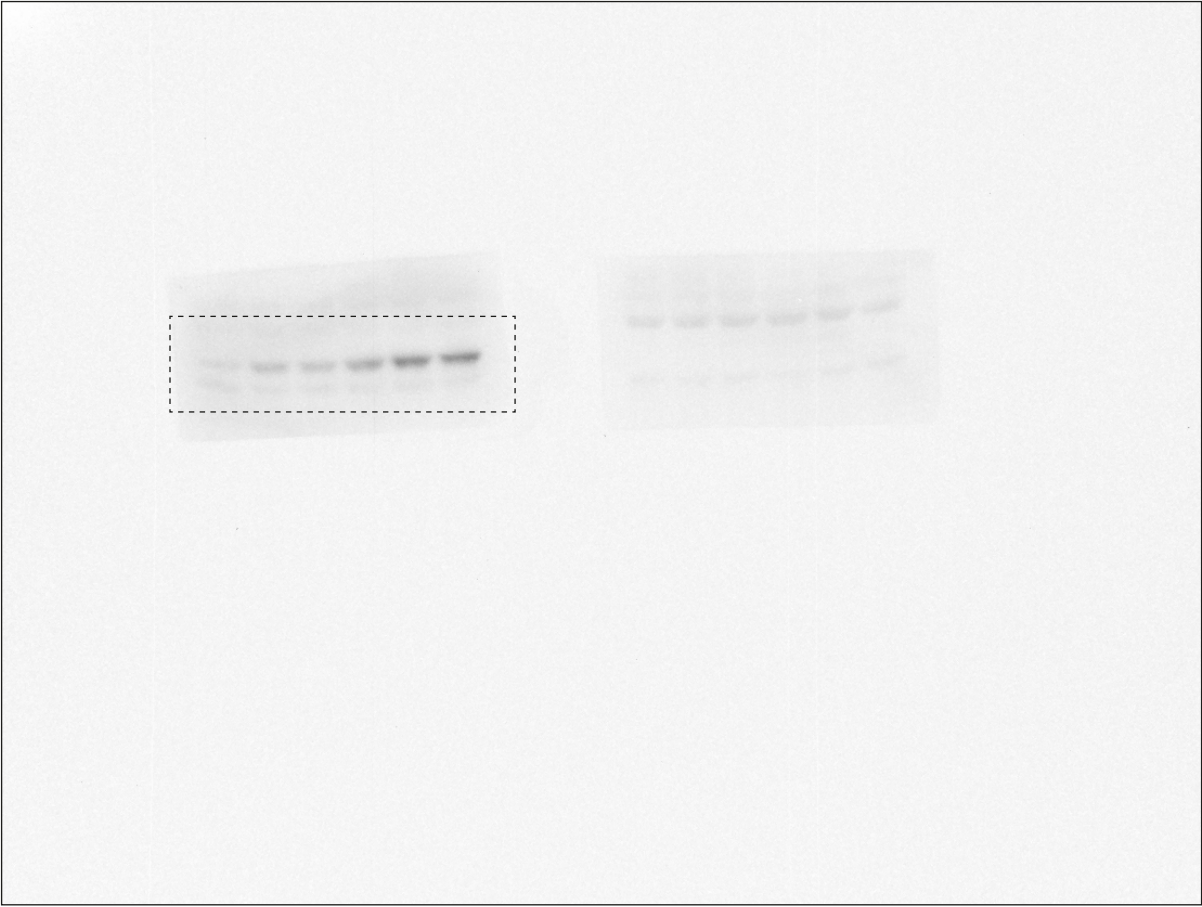

eIF2 $\alpha$

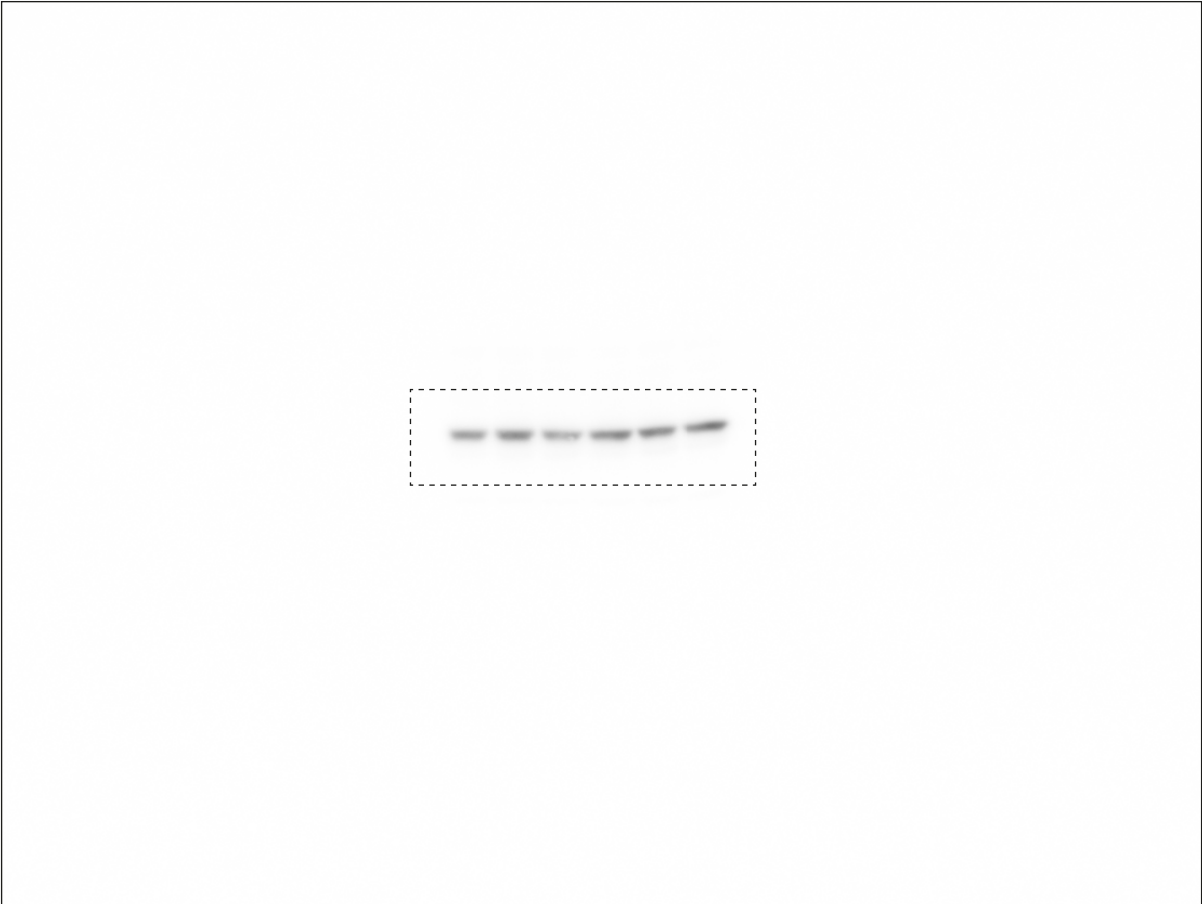

ponceau

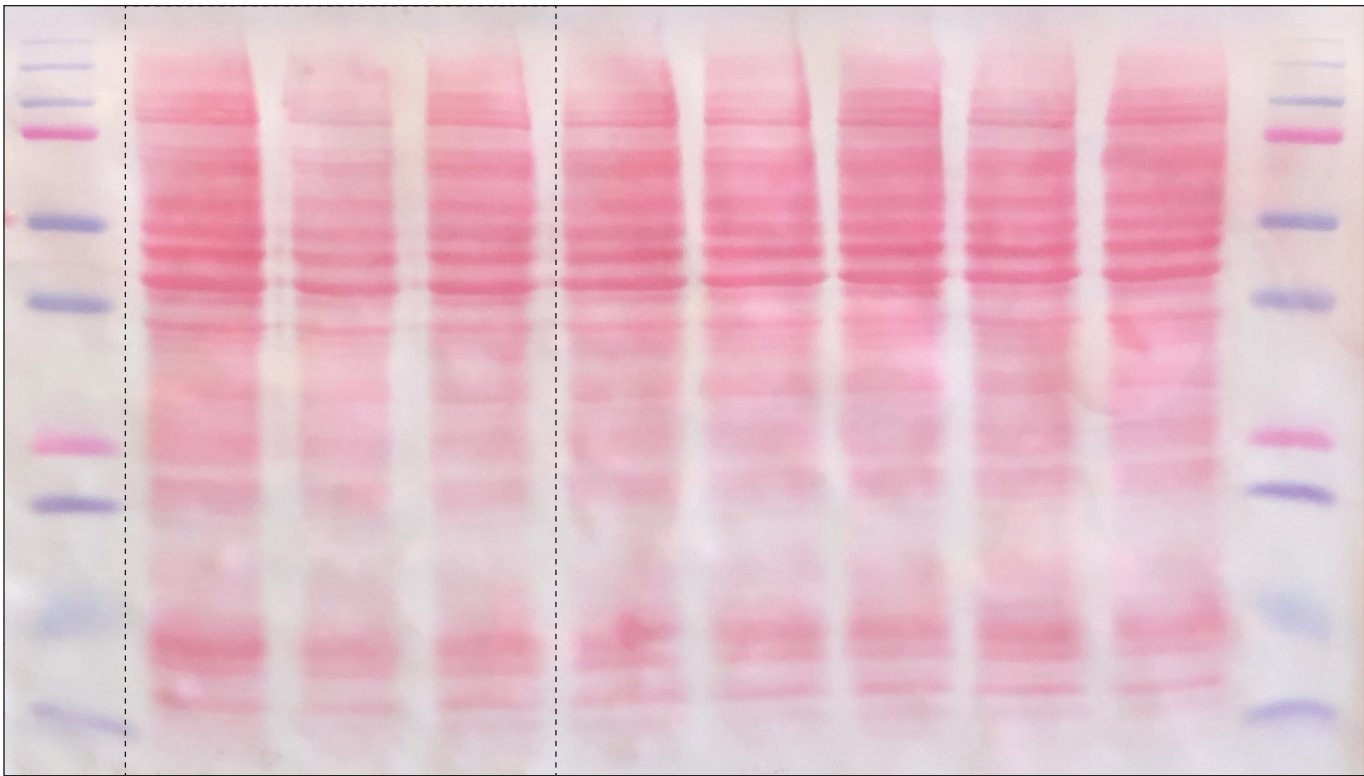

PMY

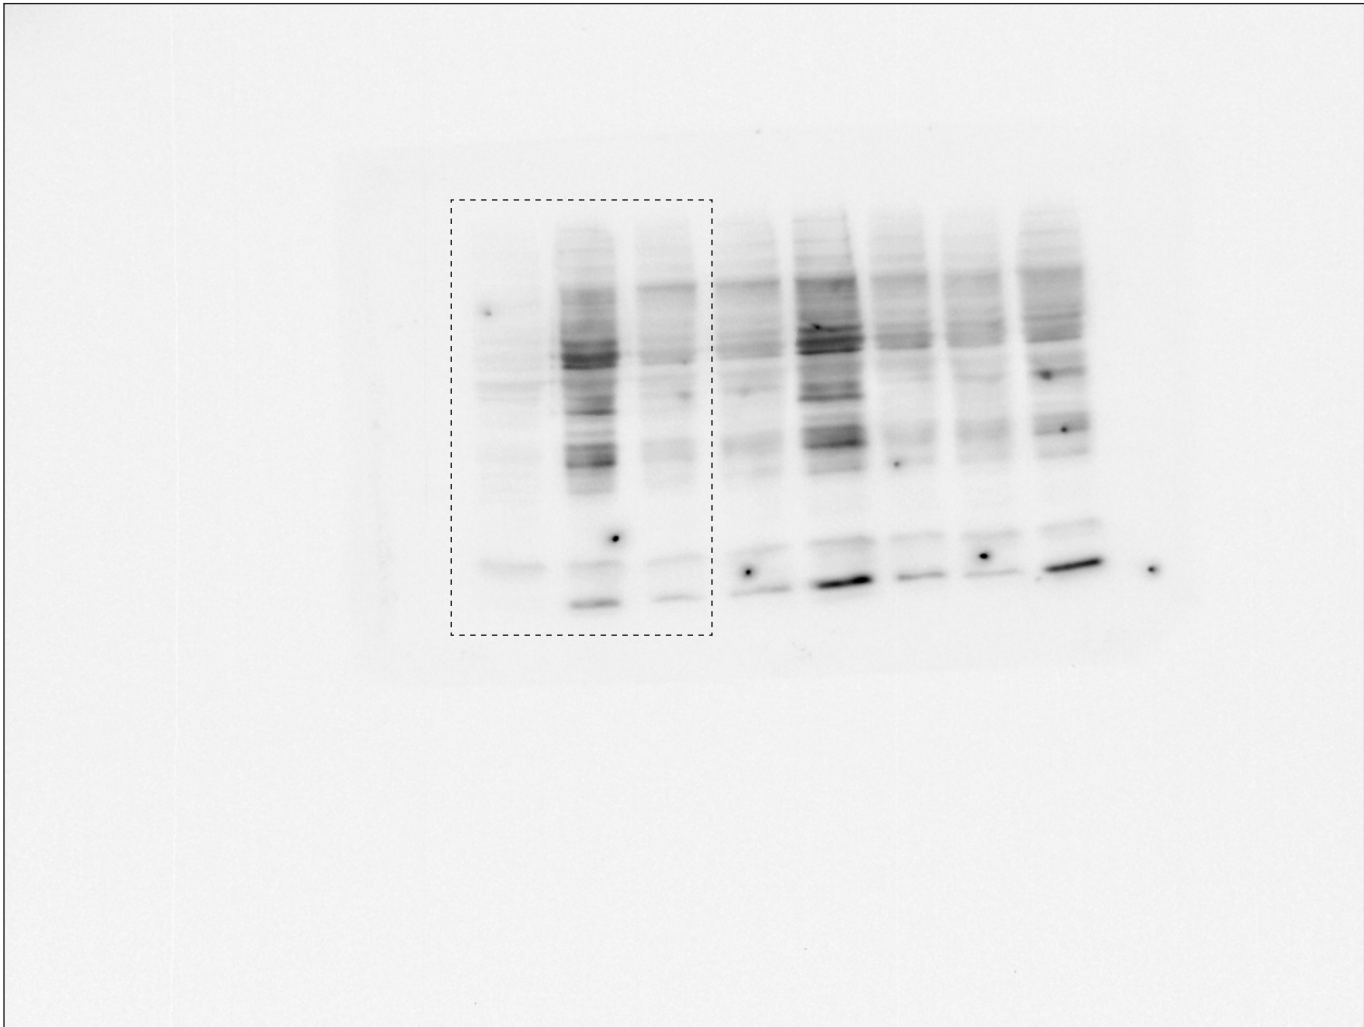

GADD34

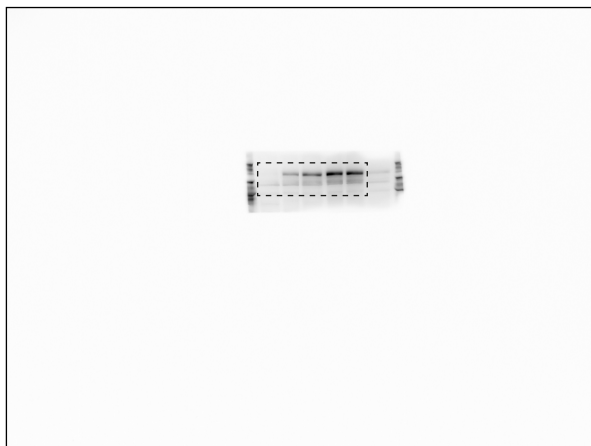

p-eIF2 $\alpha$ / eIF2 $\alpha$

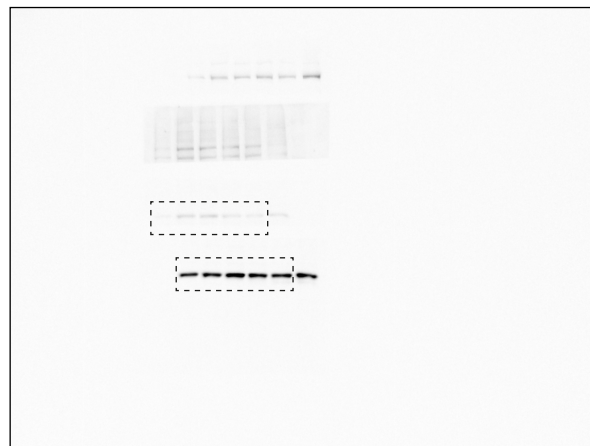

$\beta$ -actin

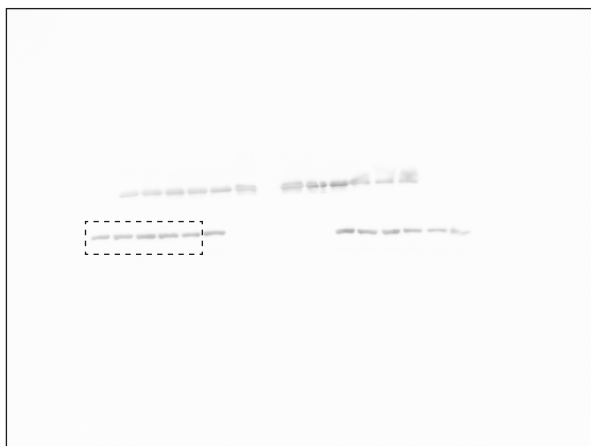

CHOP

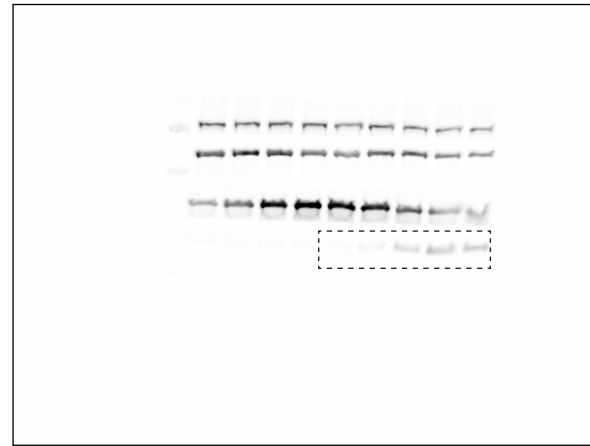

ATF4

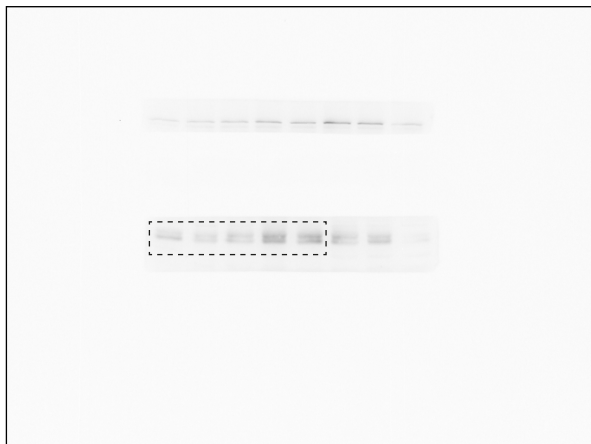

GAPDH

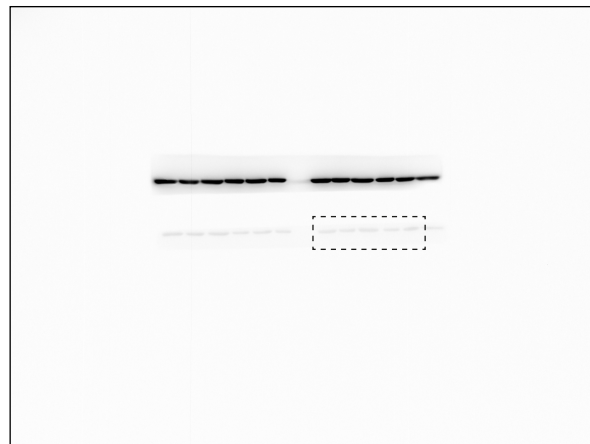

Supplement: JCB_202111100_SourceDataF3.pdf [file JCB_202111100_SourceDataF3.pdf]
