# Supplementary material for: Signaling by the integrated stress response kinase PKR is fine-tuned by dynamic clustering
Source: PubMed Central journal article supplement (PMC9086502; doi:10.1083/jcb.202111100), 2022-05-06

GAPDH

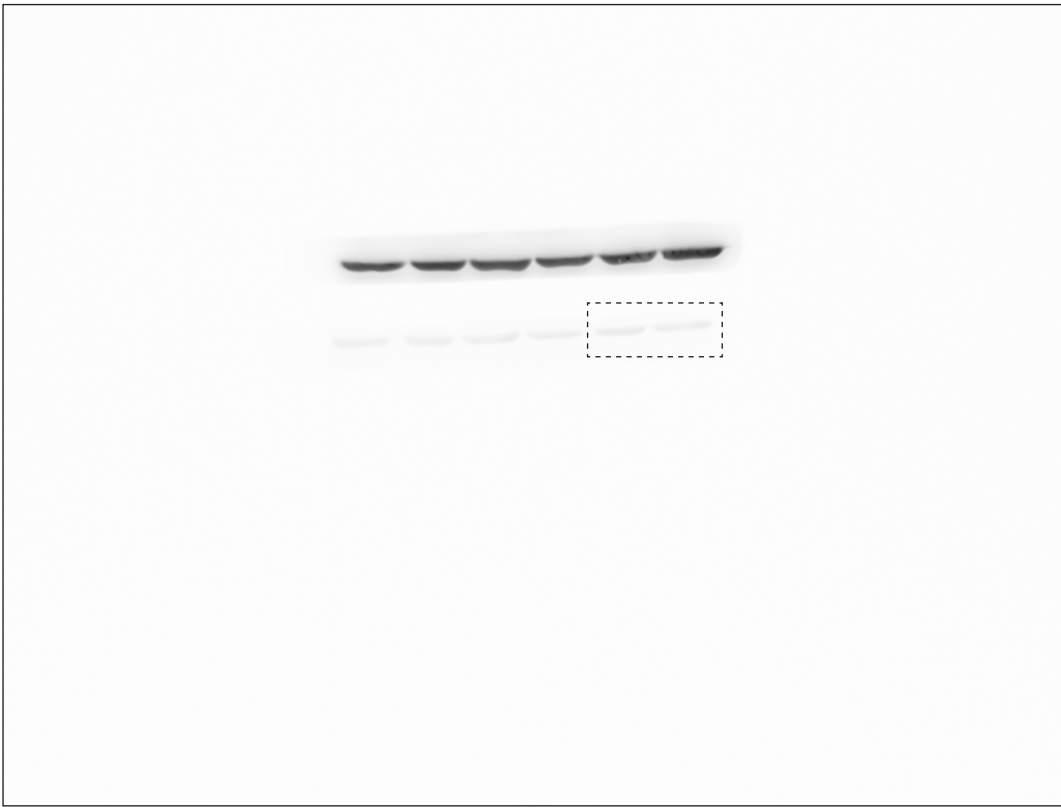

PKR

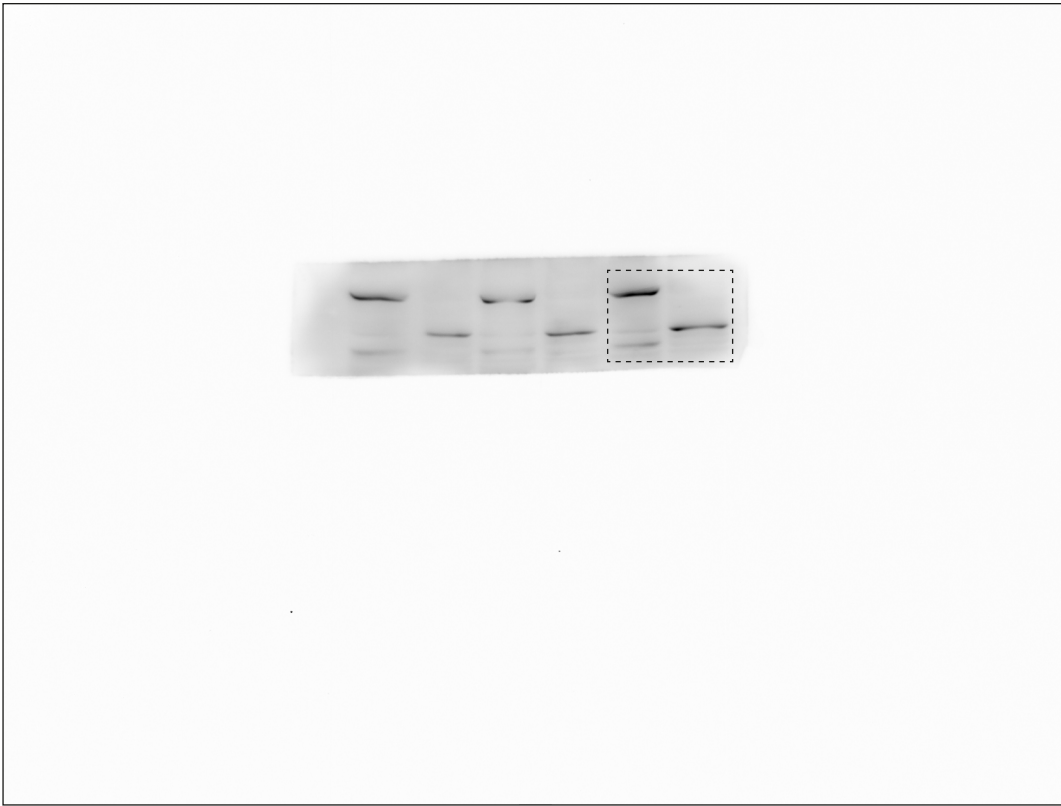

PKR

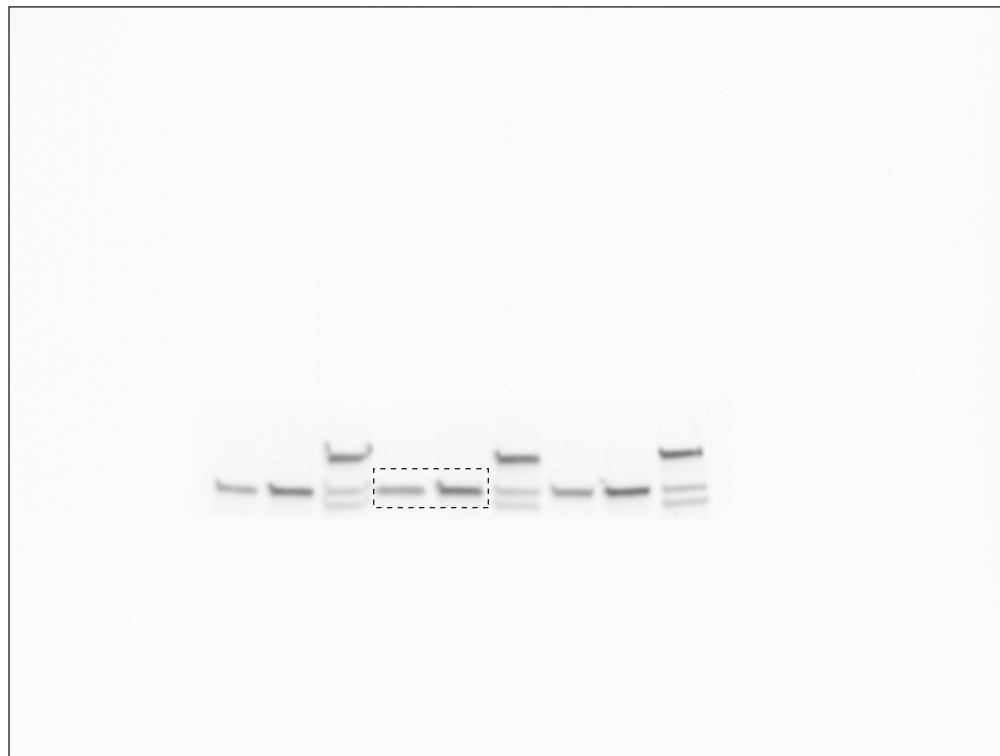

GAPDH

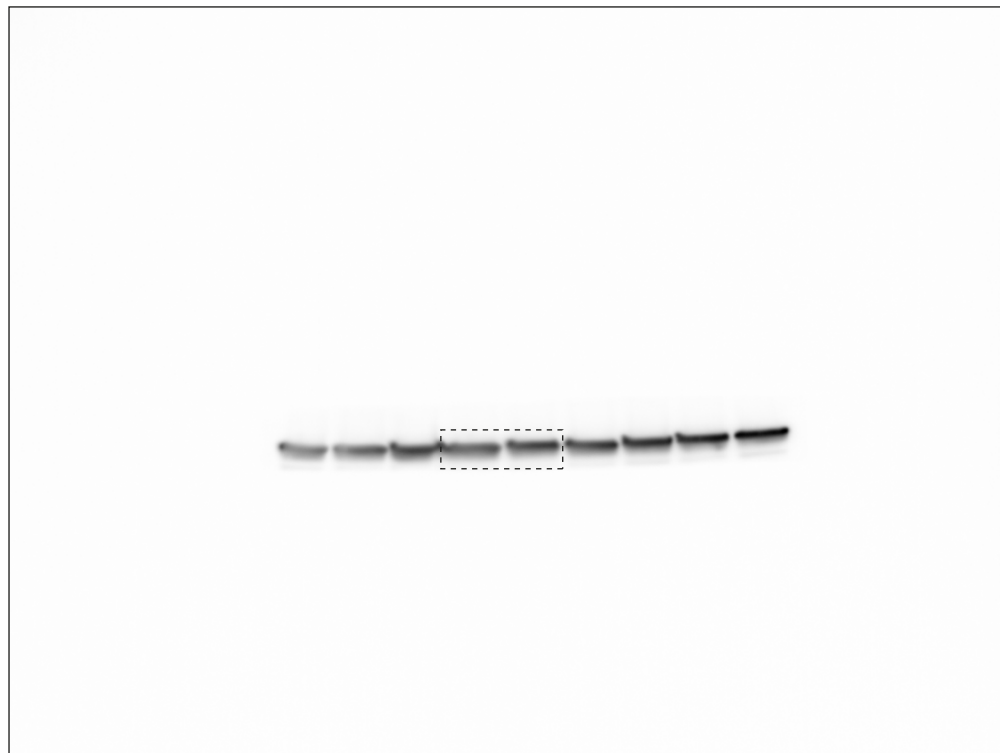

p-PKR

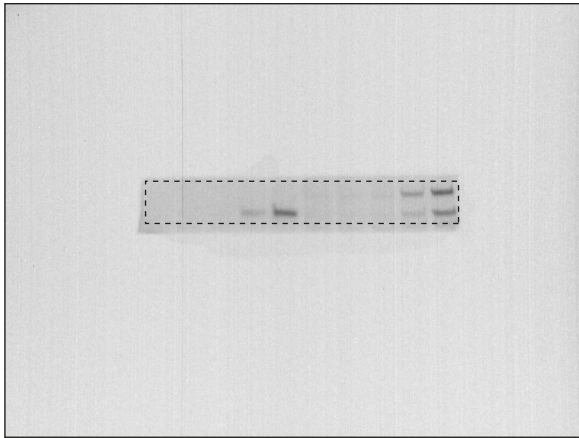

PKR

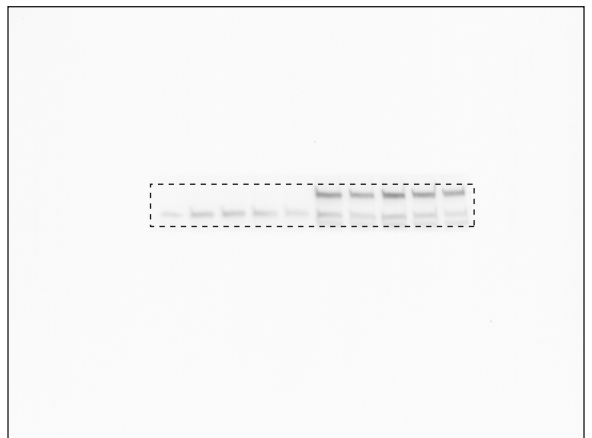

p-eIF2 $\alpha$

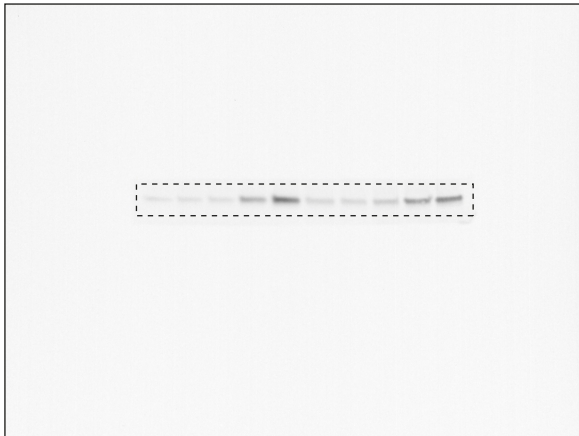

eIF2 $\alpha$

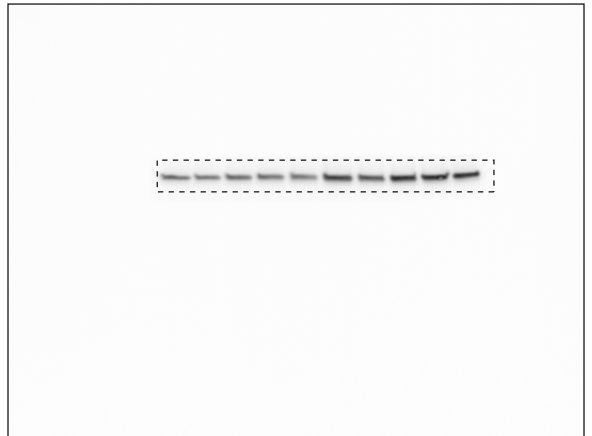

Supplement: JCB_202111100_SourceDataFS1.pdf [file JCB_202111100_SourceDataFS1.pdf]
