# Supplementary material for: Signaling by the integrated stress response kinase PKR is fine-tuned by dynamic clustering
Source: PubMed Central journal article supplement (PMC9086502; doi:10.1083/jcb.202111100), 2022-05-06

p-PKR

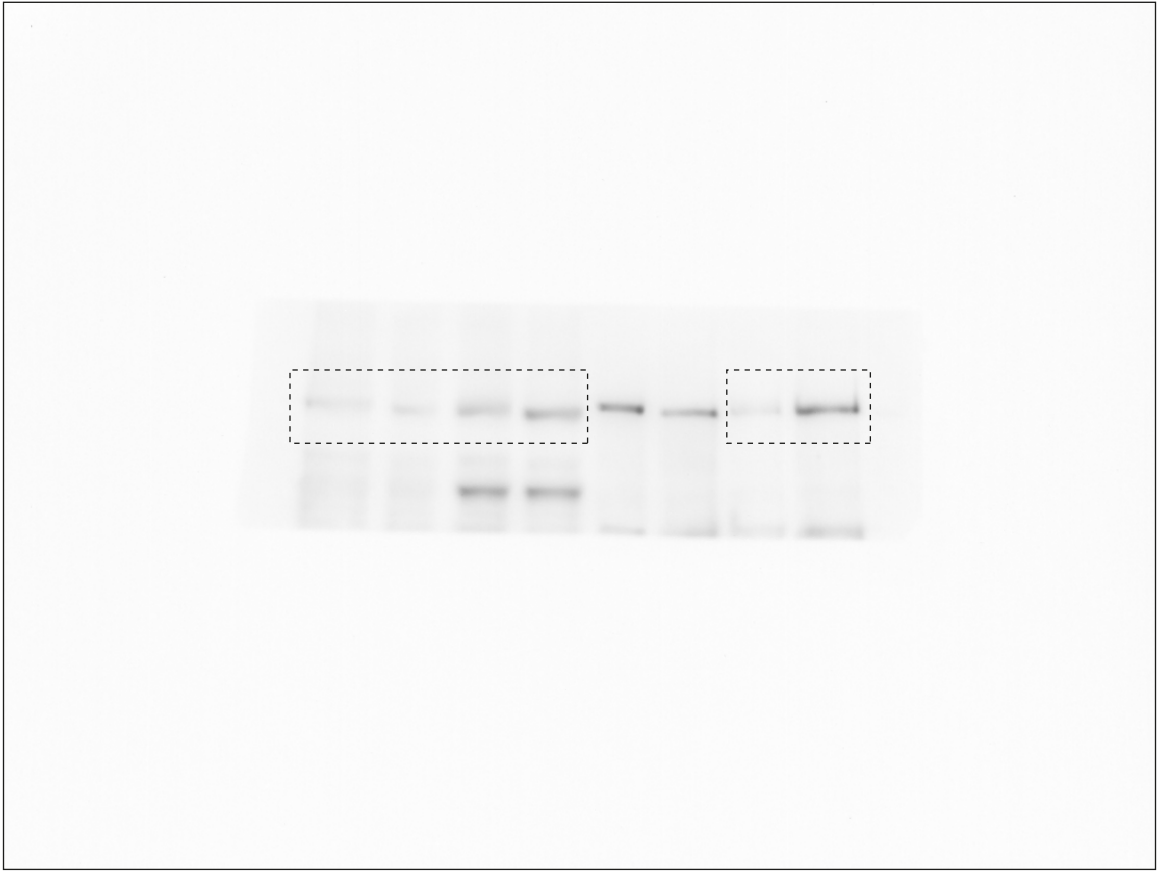

P-PKR

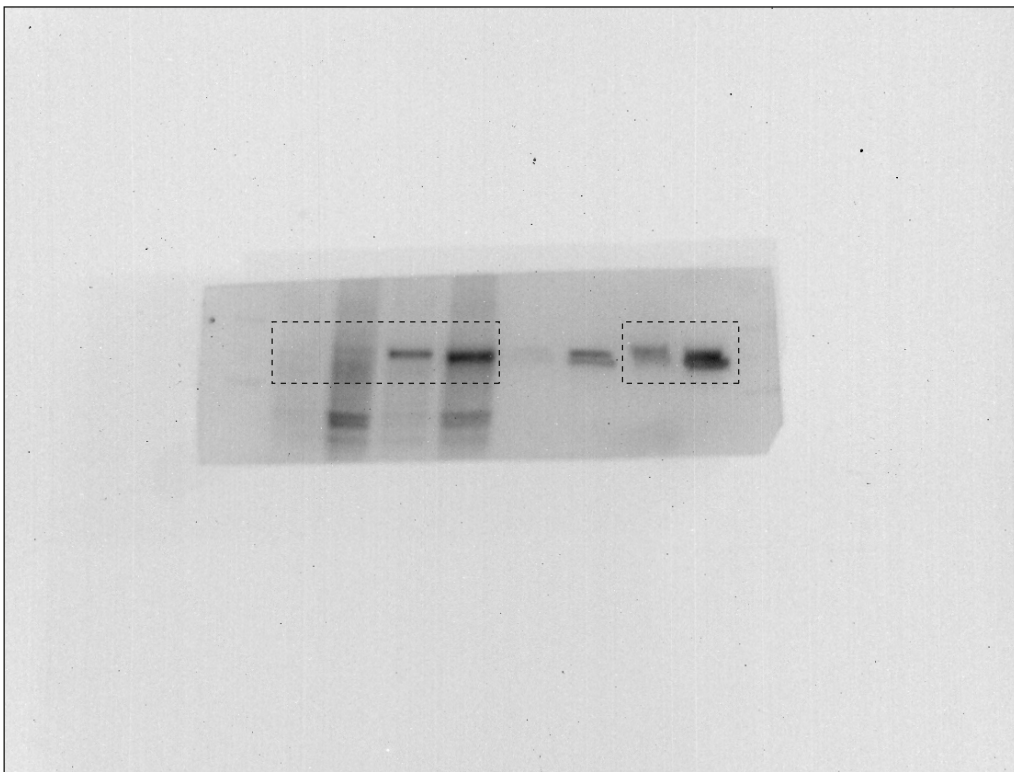

Flag

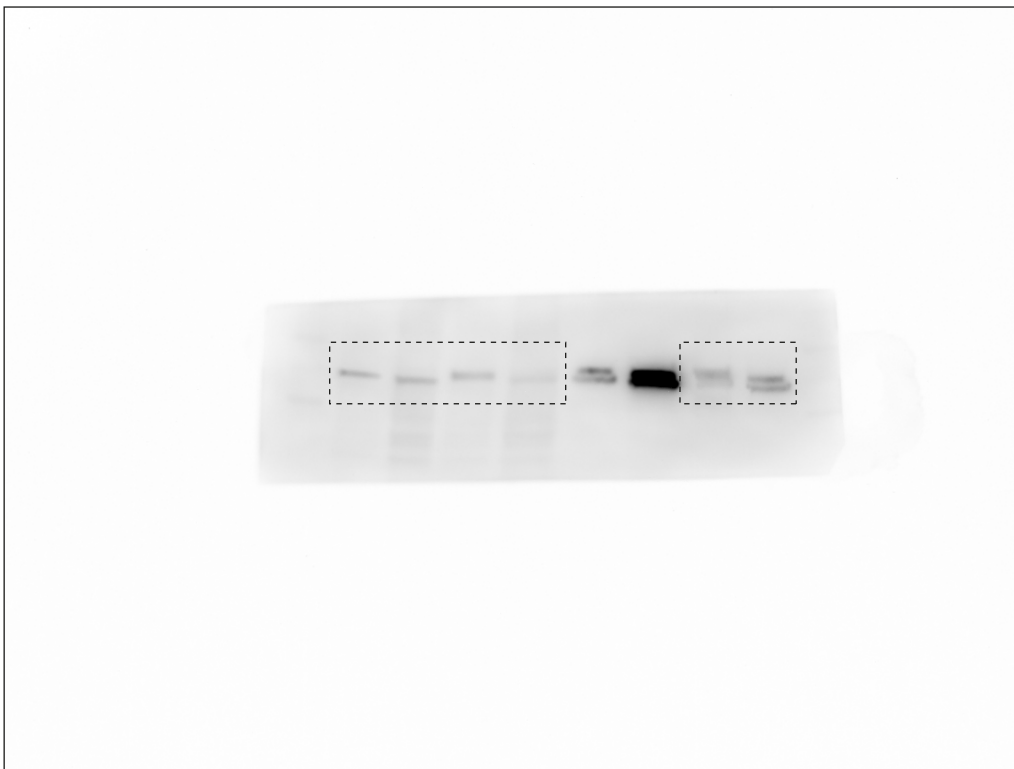

Supplement: JCB_202111100_SourceDataFS5.pdf [file JCB_202111100_SourceDataFS5.pdf]
